# Supplementary material for: Isothiocyanates, Nitriles, and Epithionitriles from Glucosinolates Are Affected by Genotype and Developmental Stage in Brassica oleracea Varieties
Source: PubMed Central journal article supplement (PMC5479884; doi:10.3389/fpls.2017.01095), 2017-06-22
Supplement: Image_7.pdf [file Image_7.pdf]

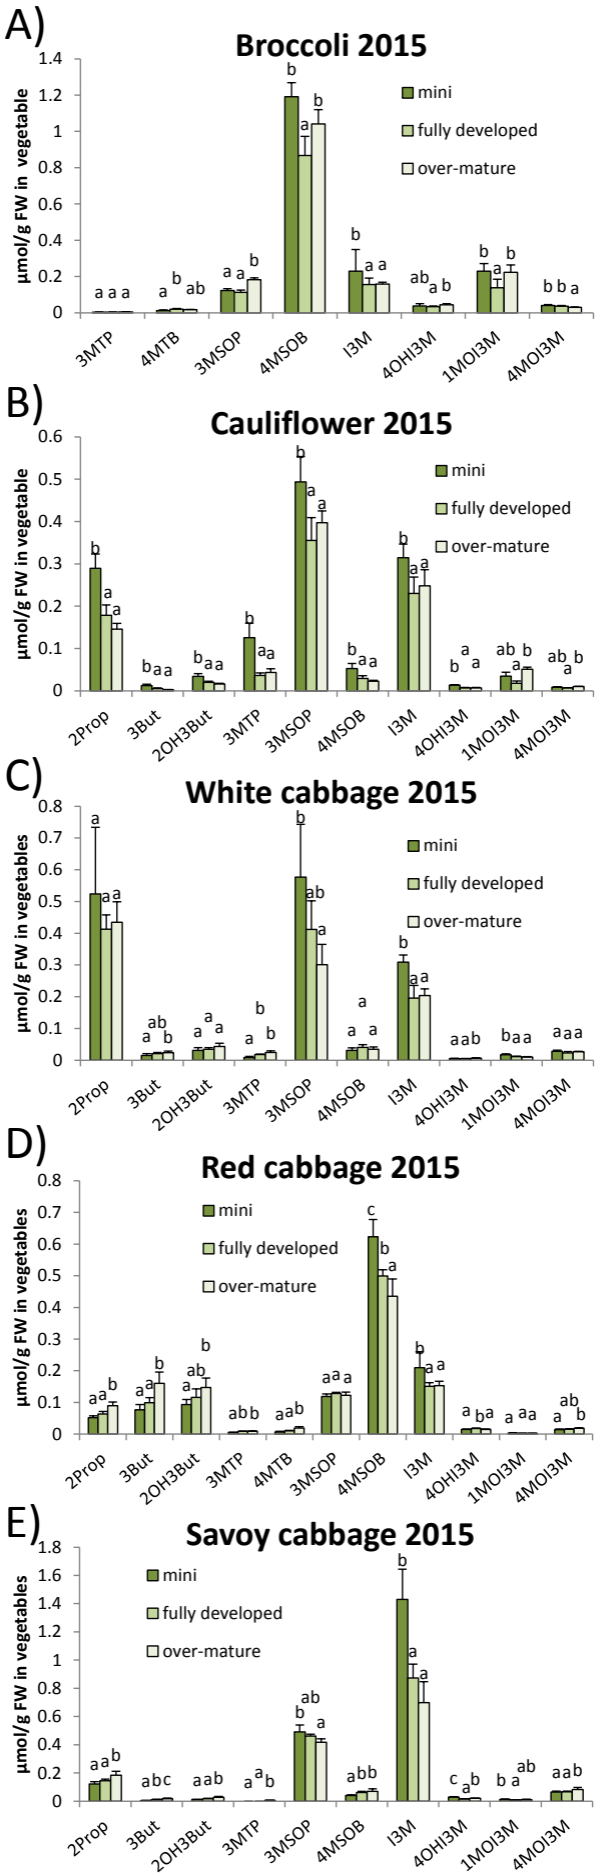

Supplementary Figure 7: Influence of head ontogeny on the glucosinolate content in 2015 [ $\mu\text{mol/g FW}$ ] in broccoli A), cauliflower B), white cabbage C), red cabbage D), and savoy cabbage E). Abbreviations: see Table 2. Statistical information according to Figure 7.
